# Supplementary material for: Four highly efficient cuprous complexes and their applications in solution-processed organic light-emitting diodes
Source: Royal Society of Chemistry journal article supplement (doi:10.1039/c5ra04591f), 2015-01-01
Supplement: c5ra04591f1.pdf [file c5ra04591f1.pdf]

Supporting Information

**Four highly efficient cuprous complexes and their applications  
in solution-processed organic light-emitting diodes**

Qing Zhang,<sup>a, b, c</sup> Xu-Lin Chen,<sup>a, b</sup> Jun Chen,<sup>c</sup> Xiao-Yuan Wu,<sup>a, b</sup> Rongmin Yu,<sup>a, b</sup> and Can-Zhong Lu\*<sup>a, b</sup>

<sup>a</sup> Key Laboratory of Design and Assembly of Functional Nanostructures, Fujian Institute of Research on the Structure of Matter, Chinese Academy of Sciences; Fuzhou, Fujian 350002, China. Fax: +86-591-8370-5794. E-mail: czlu@fjirsm.ac.cn.

<sup>b</sup> Fujian Provincial Key Laboratory of Nanomaterials, Fujian Institute of Research on the Structure of Matter, Chinese Academy of Sciences.

<sup>c</sup> Graduate University of Chinese Academy of Sciences, Beijing 100049, China.

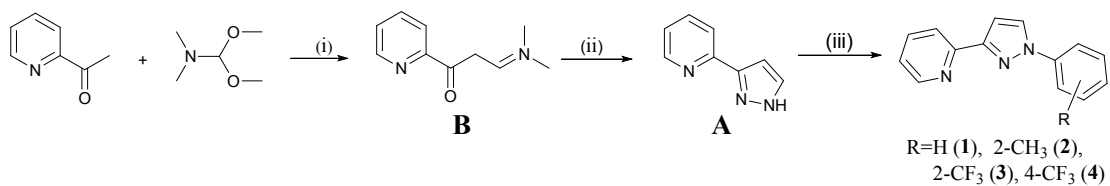

**Fig. S1.** Synthesis of N-functionalized 3-C-linked pyrazolyl pyridine diimine ligands. (i) Reflux, 16 h. (ii) 2 eq of hydrazine hydrate in ethanol, reflux for 2 h. (iii) 0.2 eq of cuprous iodine, 0.4 eq of 1,10-phenanthroline, 1 eq of benzene halide and 2 eq of cesium carbonate, under nitrogen, at 100 °C, 24 h.

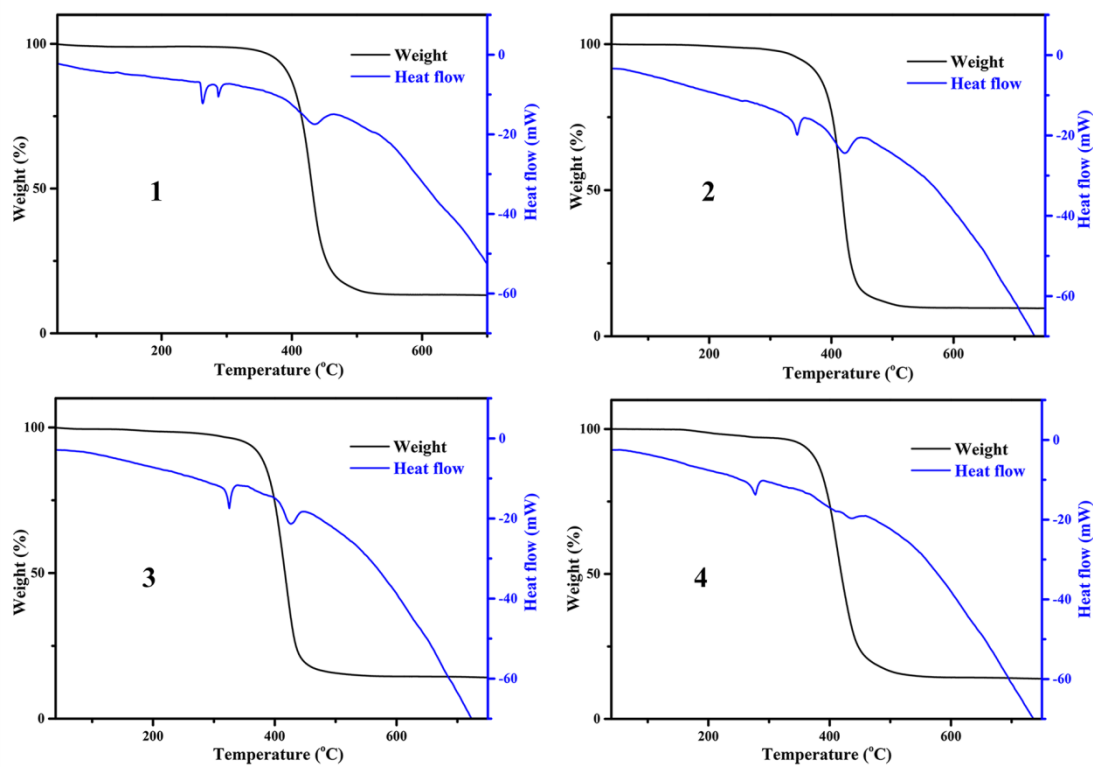

**Fig. S2.** TGA-plots and heat flow curve of complexes 1, 2, 3 and 4.

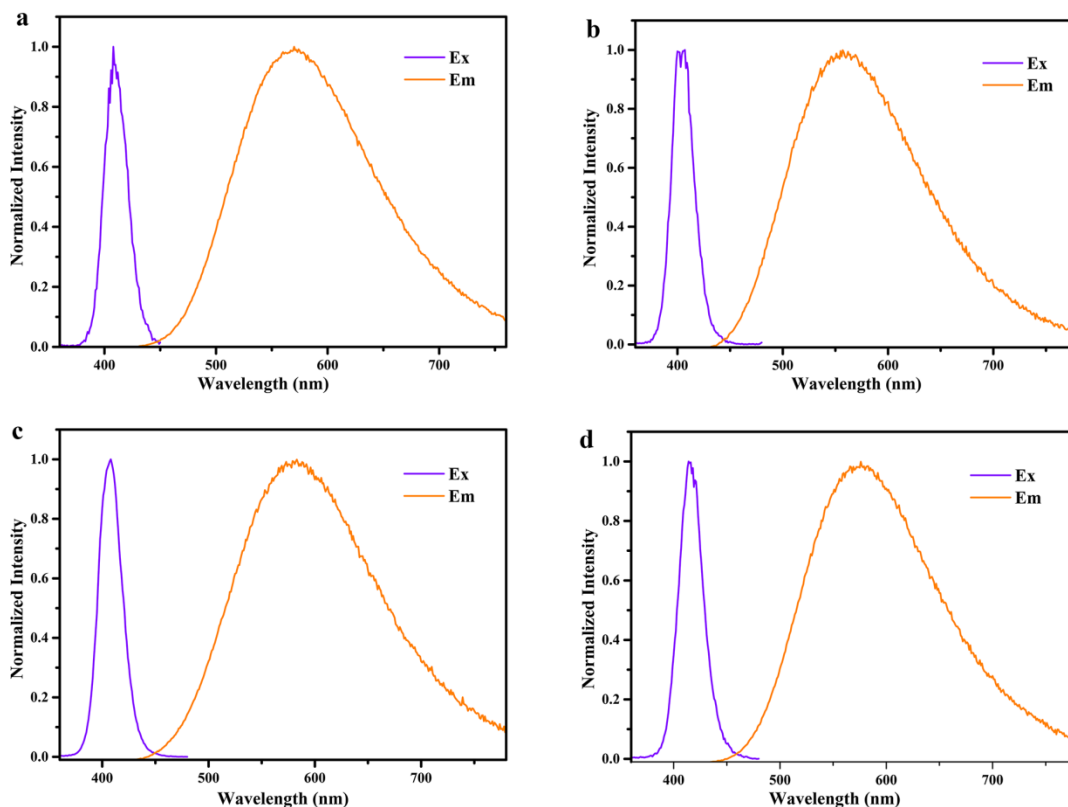

Fig. S3. Excitation and emission spectra of **1** (a), **2** (b), **3** (c) and **4** (d) in the degassed  $\text{CH}_2\text{Cl}_2$ .

Table S1. Crystallographic data and structural refinements of **1–4**.

|                                               | <b>1</b>                                                                  | <b>2</b>                                                       | <b>3</b>                                                                | <b>4</b>                                                       |
|-----------------------------------------------|---------------------------------------------------------------------------|----------------------------------------------------------------|-------------------------------------------------------------------------|----------------------------------------------------------------|
| <b>Formula</b>                                | $\text{C}_{52}\text{H}_{41}\text{BCl}_4\text{CuF}_4\text{N}_3\text{OP}_2$ | $\text{C}_{51}\text{H}_{41}\text{BCuF}_4\text{N}_3\text{OP}_2$ | $\text{C}_{53}\text{H}_{44}\text{BCuF}_7\text{N}_3\text{O}_2\text{P}_2$ | $\text{C}_{51}\text{H}_{38}\text{BCuF}_7\text{N}_3\text{OP}_2$ |
| <b><math>M_r</math> (g mol<sup>-1</sup>)</b>  | 1077.97                                                                   | 924.16                                                         | 1024.20                                                                 | 978.13                                                         |
| <b>Space group</b>                            | P-1                                                                       | C2/c                                                           | C2/c                                                                    | P-1                                                            |
| <b><math>a/\text{\AA}</math></b>              | 13.2091(6)                                                                | 22.372(5)                                                      | 22.0434(4)                                                              | 9.897(3)                                                       |
| <b><math>b/\text{\AA}</math></b>              | 13.3548(7)                                                                | 19.795(4)                                                      | 20.1776(3)                                                              | 13.698(4)                                                      |
| <b><math>c/\text{\AA}</math></b>              | 16.3937(9)                                                                | 21.048(5)                                                      | 20.7778(3)                                                              | 18.292(5)                                                      |
| <b><math>\alpha^\circ</math></b>              | 70.325(5)                                                                 | 90                                                             | 90                                                                      | 90.898(3)                                                      |
| <b><math>\beta^\circ</math></b>               | 72.633(4)                                                                 | 97.376(4)                                                      | 93.697(2)                                                               | 90.739(2)                                                      |
| <b><math>\gamma^\circ</math></b>              | 64.418(4)                                                                 | 90                                                             | 90                                                                      | 108.964(5)                                                     |
| <b><math>V/\text{\AA}^3</math></b>            | 2415.9(2)                                                                 | 9244(4)                                                        | 9222.4(3)                                                               | 2344.6(11)                                                     |
| <b><math>Z</math></b>                         | 2                                                                         | 8                                                              | 8                                                                       | 2                                                              |
| <b><math>D_c/\text{g cm}^{-3}</math></b>      | 1.482                                                                     | 1.328                                                          | 1.475                                                                   | 1.386                                                          |
| <b><math>\mu/\text{mm}^{-1}</math></b>        | 3.787                                                                     | 0.599                                                          | 1.967                                                                   | 0.603                                                          |
| <b><math>F(000)</math></b>                    | 1100                                                                      | 3808                                                           | 4208                                                                    | 1000                                                           |
| <b>total reflns</b>                           | 15986                                                                     | 36465                                                          | 16539                                                                   | 22587                                                          |
| <b>unique reflns</b>                          | 9468                                                                      | 10543                                                          | 9074                                                                    | 10594                                                          |
| <b><math>R_{\text{int}}</math></b>            | 0.0290                                                                    | 0.0268                                                         | 0.0145                                                                  | 0.0312                                                         |
| <b>GOF</b>                                    | 1.024                                                                     | 1.078                                                          | 0.994                                                                   | 1.001                                                          |
| <b><math>R_1^a [I &gt; 2\sigma(I)]</math></b> | 0.0534                                                                    | 0.0651                                                         | 0.0404                                                                  | 0.0606                                                         |
| <b><math>wR_2^b</math> (all data)</b>         | 0.2040                                                                    | 0.2128                                                         | 0.1270                                                                  | 0.2075                                                         |
| <b>CCDC</b>                                   | 1041001                                                                   | 1041002                                                        | 1041003                                                                 | 1041004                                                        |

<sup>a</sup>  $R_1 = \sum(F_o - F_c) / \sum F_o$ ; <sup>b</sup>  $wR_2 = [\sum w(F_o^2 - F_c^2)^2 / \sum w(F_o^2)^2]^{1/2}$ .

**Table S2.** Selected bond lengths (Å) and angles (°) for **1–4**.

| <b>1</b>        |            |                 |             |
|-----------------|------------|-----------------|-------------|
| Cu(1)–N(2)      | 2.0908(17) | Cu(1)–P(1)      | 2.2512(6)   |
| Cu(1)–N(3)      | 2.1102(18) | Cu(1)–P(2)      | 2.2609(5)   |
| N(2)–Cu(1)–N(3) | 79.02(7)   | N(2)–Cu(1)–P(2) | 106.27(5)   |
| N(2)–Cu(1)–P(1) | 135.58(5)  | N(3)–Cu(1)–P(2) | 116.70(5)   |
| N(3)–Cu(1)–P(1) | 107.30(5)  | P(1)–Cu(1)–P(2) | 109.05(2)   |
| <b>2</b>        |            |                 |             |
| Cu(1)–N(2)      | 2.095(3)   | Cu(1)–P(1)      | 2.2536(9)   |
| Cu(1)–N(3)      | 2.106(3)   | Cu(1)–P(2)      | 2.2573(9)   |
| N(2)–Cu(1)–N(3) | 79.34(10)  | N(2)–Cu(1)–P(2) | 112.08(7)   |
| N(2)–Cu(1)–P(1) | 128.08(7)  | N(3)–Cu(1)–P(2) | 112.31(7)   |
| N(3)–Cu(1)–P(1) | 107.86(8)  | P(1)–Cu(1)–P(2) | 111.74(3)   |
| <b>3</b>        |            |                 |             |
| Cu(1)–N(2)      | 2.0700(17) | Cu(1)–P(2)      | 2.2410(5)   |
| Cu(1)–N(3)      | 2.0986(16) | Cu(1)–P(1)      | 2.2547(5)   |
| N(2)–Cu(1)–N(3) | 79.08(7)   | N(2)–Cu(1)–P(1) | 126.11(5)   |
| N(2)–Cu(1)–P(2) | 114.33(5)  | N(3)–Cu(1)–P(1) | 105.77(5)   |
| N(3)–Cu(1)–P(2) | 114.08(5)  | P(2)–Cu(1)–P(1) | 111.880(19) |
| <b>4</b>        |            |                 |             |
| Cu(1)–N(3)      | 2.067(3)   | Cu(1)–P(2)      | 2.2871(10)  |
| Cu(1)–N(2)      | 2.208(3)   | Cu(1)–P(1)      | 2.3012(10)  |
| N(3)–Cu(1)–N(2) | 78.46(10)  | N(3)–Cu(1)–P(1) | 114.72(8)   |
| N(3)–Cu(1)–P(2) | 117.06(8)  | N(2)–Cu(1)–P(1) | 108.67(8)   |
| N(2)–Cu(1)–P(2) | 117.90(7)  | P(2)–Cu(1)–P(1) | 114.85(3)   |

**Table S3.** Decay time of **1** at varied temperatures.

| T (K)               | 77  | 100 | 130 | 150 | 180 | 210 | 250 | 270 | 298 |
|---------------------|-----|-----|-----|-----|-----|-----|-----|-----|-----|
| $\tau^a$ ( $\mu$ s) | 292 | 286 | 273 | 248 | 200 | 136 | 76  | 50  | 41  |

<sup>a</sup> Emission decay time (monoexponential fit, error  $\pm$  5%)
